# Supplementary material for: Single pot selective hydrogenation of furfural to 2-methylfuran over carbon supported iridium catalysts
Source: Royal Society of Chemistry journal article supplement (doi:10.1039/c8gc00284c), 2018-01-01
Supplement: c8gc00284c1.pdf [file c8gc00284c1.pdf]

# Single Pot Selective Hydrogenation of Furfural to 2-Methylfuran Over Carbon Supported Iridium Catalysts

Nandan S. Date <sup>a,b</sup>, Amol M. Hengne <sup>c</sup>, K-W Huang <sup>c</sup>, Rajeev C. Chikate <sup>b\*</sup>,  
Chandrashekhar V. Rode <sup>a\*</sup>

[a] Chemical Engineering and Process Development Division, CSIR-National Chemical laboratory, Dr Homi Bhabha Road, Pashan, Pune-411008.

[b] Post-graduate & research centre, Department of Chemistry, M. E. S.' S Abasaheb Garware college of Arts and Science, Karve road, Pune-41100

[C] KAUST Catalysis Center and Division of Physical Sciences and Engineering, King Abdullah University of Science and Technology, Thuwal, 23955-6900, Kingdom of Saudi Arabia.

**# Supporting Information**

## **Table of contents:**

**Table S1: Specific BET surface area 1 to 6% Ir/C**

**Table S2: Ammonia TPD table**

**Table S3: Calculation Table of TON and TOF calculation**

**Table S4: Controlled experiment table**

**Table S5: Solvent Reuse table**

**Table S6: XPS table**

**Figure S1: XPS of 5% Ir/C Fresh Carbon**

**Figure S2: Ammonia TPD 5% Ir/C a) Fresh b) Used**

**Figure S3: Py-IR of 5% Ir/C catalyst**

**Figure S4: Effect of substrate loading**

**Figure S5: Catalyst recycles at high pressure**

**Figure S6: XRD of used 5% Ir/C**

**Figure S7: XPS of 5% Ir/C used catalyst Oxygen**

**Figure S8: XPS of 5% Ir/C used catalyst Carbon**

**Figure S9: XPS of 5% Ir/C unreduced Ir**

**Figure S10: CT profile IrO<sub>2</sub>/IrO<sub>3</sub>/C catalyst**

**Figure S11: Mass spectrum of 2-MF**

**Table S1: Specific BET surface area 1 to 6% Ir/C**

| <b>Sr. no</b> | <b>Catalyst</b>      | <b>Surface area, m<sup>2</sup>/g</b> |
|---------------|----------------------|--------------------------------------|
| <b>1</b>      | <b>Act. charcoal</b> | <b>108</b>                           |
| <b>2</b>      | <b>1% Ir/C</b>       | <b>117</b>                           |
| <b>3</b>      | <b>2% Ir/C</b>       | <b>129</b>                           |
| <b>4</b>      | <b>4% Ir/C</b>       | <b>169</b>                           |
| <b>5</b>      | <b>5% Ir/C</b>       | <b>189</b>                           |
| <b>6</b>      | <b>6% Ir/C</b>       | <b>215</b>                           |

**Table S2: NH<sub>3</sub> TPD Table: Acidity values**

| <b>Sr No</b> | <b>Catalyst</b>      | <b>Distribution of acidic sites, mmol gm<sup>-1</sup></b> |                   |                   | <b>Total NH<sub>3</sub> desorbed<br/>,mmol gm<sup>-1</sup></b> |
|--------------|----------------------|-----------------------------------------------------------|-------------------|-------------------|----------------------------------------------------------------|
|              |                      | <b>&lt;200 °C</b>                                         | <b>200-400 °C</b> | <b>&gt;400 °C</b> |                                                                |
| <b>1</b>     | <b>Fresh 5% Ir/C</b> | <b>0.0471</b>                                             | <b>0.0071</b>     | <b>0.1092</b>     | <b>0.1633</b>                                                  |
| <b>2</b>     | <b>Spent 5% Ir/C</b> | <b>0.0492</b>                                             | <b>0.0092</b>     | <b>0.1085</b>     | <b>0.1669</b>                                                  |

**Table S3: Calculation Table of TON and TOF calculation**

| <b>Sr. No.</b> | <b>Metal loading, %</b> | <b>Conv, %<br/>{Time, min}</b> | <b>Moles of FFR converted</b> | <b>Moles of metal in catalyst</b> | <b>TON</b> | <b>TOF<br/>h<sup>-1</sup></b> |
|----------------|-------------------------|--------------------------------|-------------------------------|-----------------------------------|------------|-------------------------------|
| <b>1</b>       | <b>1%</b>               | <b>14{30}</b>                  | <b>0.00364</b>                | <b>1.30x 10<sup>-5</sup></b>      | <b>280</b> | <b>560</b>                    |
| <b>2</b>       | <b>2%</b>               | <b>21{30}</b>                  | <b>0.00514</b>                | <b>2.60x 10<sup>-5</sup></b>      | <b>208</b> | <b>416</b>                    |
| <b>3</b>       | <b>4%</b>               | <b>26{30}</b>                  | <b>0.0067</b>                 | <b>5.20x 10<sup>-5</sup></b>      | <b>128</b> | <b>256</b>                    |
| <b>4</b>       | <b>5%</b>               | <b>39{30}</b>                  | <b>0.01015</b>                | <b>6.50x 10<sup>-5</sup></b>      | <b>158</b> | <b>316</b>                    |
| <b>5</b>       | <b>6%</b>               | <b>40{30}</b>                  | <b>0.01030</b>                | <b>7.80x 10<sup>-5</sup></b>      | <b>130</b> | <b>264</b>                    |

**Reaction conditions: Furfural, 2.5 g; Catalyst loading, 0.25g; Temperature, 220 °C; H<sub>2</sub> pressure, 100 psig.**

**Figure S4: Controlled experiment**

| Sr No | Catalyst                          | Press.,<br>psig | Conv.,<br>% | Selectivity, % |       |      |         |       |
|-------|-----------------------------------|-----------------|-------------|----------------|-------|------|---------|-------|
|       |                                   |                 |             | FAL            | THFAL | 2-MF | 2-MeTHF | Other |
| 1     | 5% Ir/C                           | 500             | >99         | -              | 1     | 92   | 7       | -     |
| 2     | 5% Ir/C                           | 500             | >99         | SM             | 5     | 85   | 10      | -     |
| 3     | 5% Ir/C                           | 500             | >99         | -              | -     | SM   | 100     | -     |
| 4     | 5% Ir/C                           | 100             | >99         | -              | 1     | 95   | 4       | -     |
| 5     | 5% Ir/C                           | 100             | >99         | -              | -     | SM   | 100     | -     |
| 5     | 5% Ir/C unreduced                 | 100             | 60          | SM             | -     | 94   | 1       | 5     |
| 6     | 5% Ir/C (H <sub>2</sub> reduced#) | 100             | >99         | -              | 29    | 25   | 38      | 8     |

**Reaction conditions:** Substrate, 2.5g; solvent (IPA), 95ml; catalyst, 0.25g; temperature, 220°C; Agitation speed, 1000, time, 5h. {SM- Starting Material/Substrate}; #= Furfural and THF (4%)

Reduction protocol:

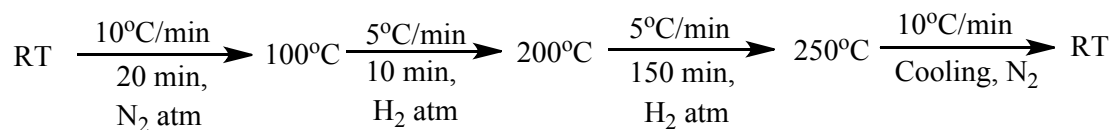

**Table S5: Solvent reuse table**

| Sr No | Catalyst | Conv., % | Selectivity, % |       |      |         |       |
|-------|----------|----------|----------------|-------|------|---------|-------|
|       |          |          | FAL            | THFAL | 2-MF | 2-MeTHF | Other |
| 1     | Fresh    | >99      | -              | 1     | 95   | 4       | -     |
| 2     | R1       | >99      | -              | 1     | 94   | 4       | -     |
| 3     | R2       | 98       | 1              | 1     | 93   | 5       | -     |

**Reaction conditions:** Substrate, 2.5g; solvent (IPA), 95ml; catalyst, 0.25g; temperature, 220°C;

H<sub>2</sub> pressure, 100 psig; Agitation speed, 1000, Reaction time, 5h.

**Table S6: XPS table**

| Sr. No | Catalyst                     | Binding energy, e.V.(%) |                   |                   |                   | Satellite peaks e.V. |
|--------|------------------------------|-------------------------|-------------------|-------------------|-------------------|----------------------|
|        |                              | Metallic Iridium        |                   | Oxides of Iridium |                   |                      |
|        |                              | 4f <sub>7/2</sub>       | 4f <sub>5/2</sub> | 4f <sub>7/2</sub> | 4f <sub>5/2</sub> |                      |
| 1      | 5% Ir/C<br>Fresh             | 60.9                    | 63.94             | 61.5              | 64.41             | 66.31                |
|        |                              | (27)                    | (12)              | (11)              | (20)              |                      |
| 2      | 5% Ir/C<br>Used              | 59.85                   | 63.92             | 62.21             | 64.53             | 69.21                |
|        |                              | (1)                     | (25)              | (21)              | (9)               |                      |
|        |                              | 60.95                   |                   | 61.11             |                   | 66.11                |
|        |                              | (4)                     |                   | (20)              |                   |                      |
| 3      | 5% Ir/ C<br>w/o<br>reduction | --                      | --                | 61.32             | 64.75             | 68.15                |
|        |                              |                         |                   | (21)              | (19)              |                      |
|        |                              |                         |                   | 62.68             |                   |                      |
|        |                              |                         |                   | (10)              |                   |                      |
|        |                              |                         |                   | 61.29             |                   |                      |
|        |                              |                         |                   | (72)              | 64.59             | 59.08                |
|        |                              |                         |                   | 63.62             | (6)               |                      |
|        |                              |                         |                   | (22)              |                   |                      |

**Figure S1: XPS of 5% Ir/C Fresh catalyst: Carbon**

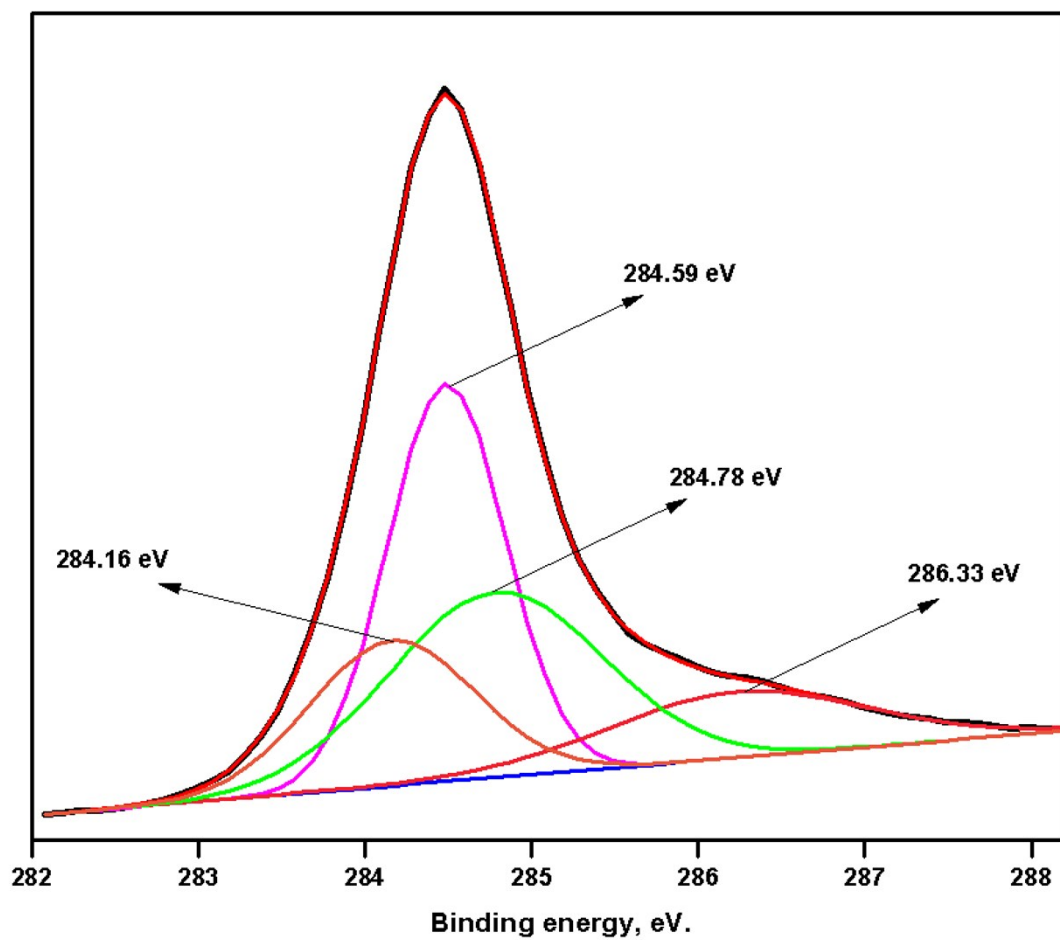

Figure S2: NH<sub>3</sub>-TPD of 5% r/C catalyst

A) Fresh B) Used

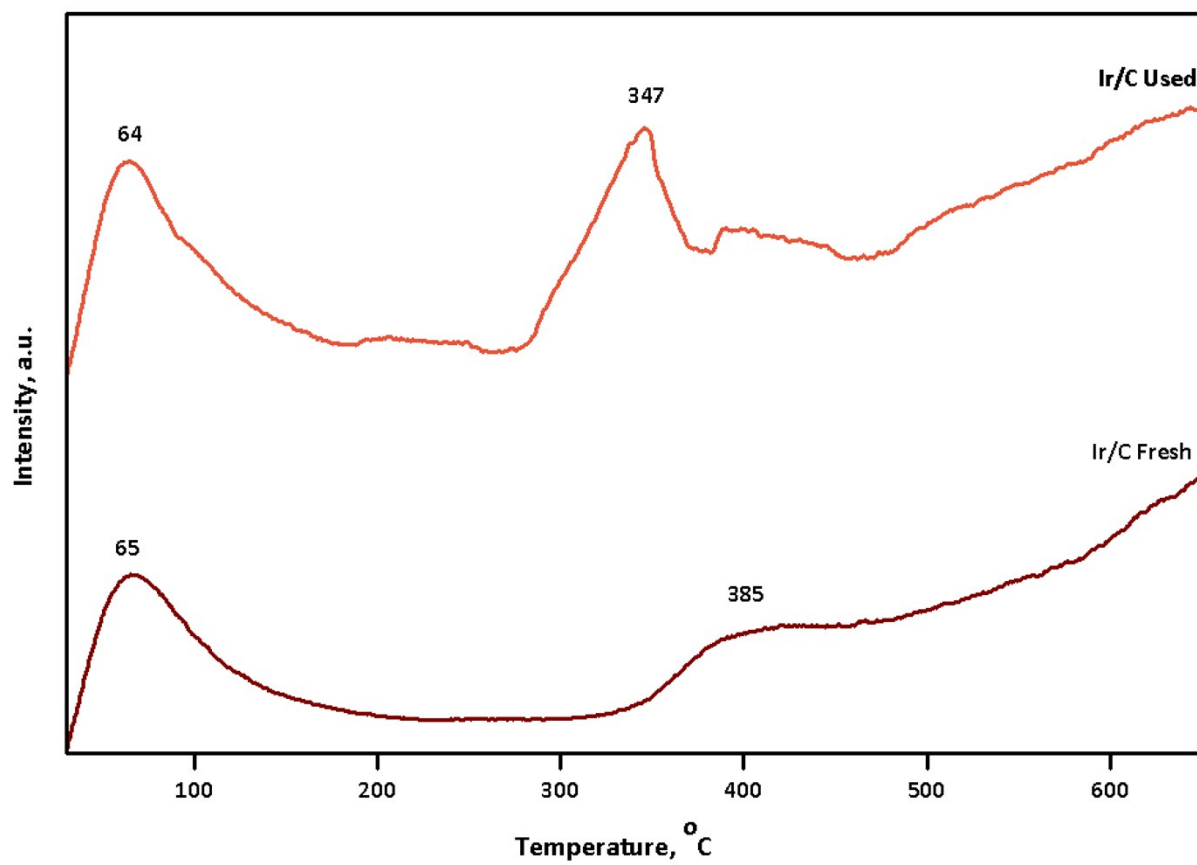



Figure S3: Py-IR of 5% Ir/C catalyst

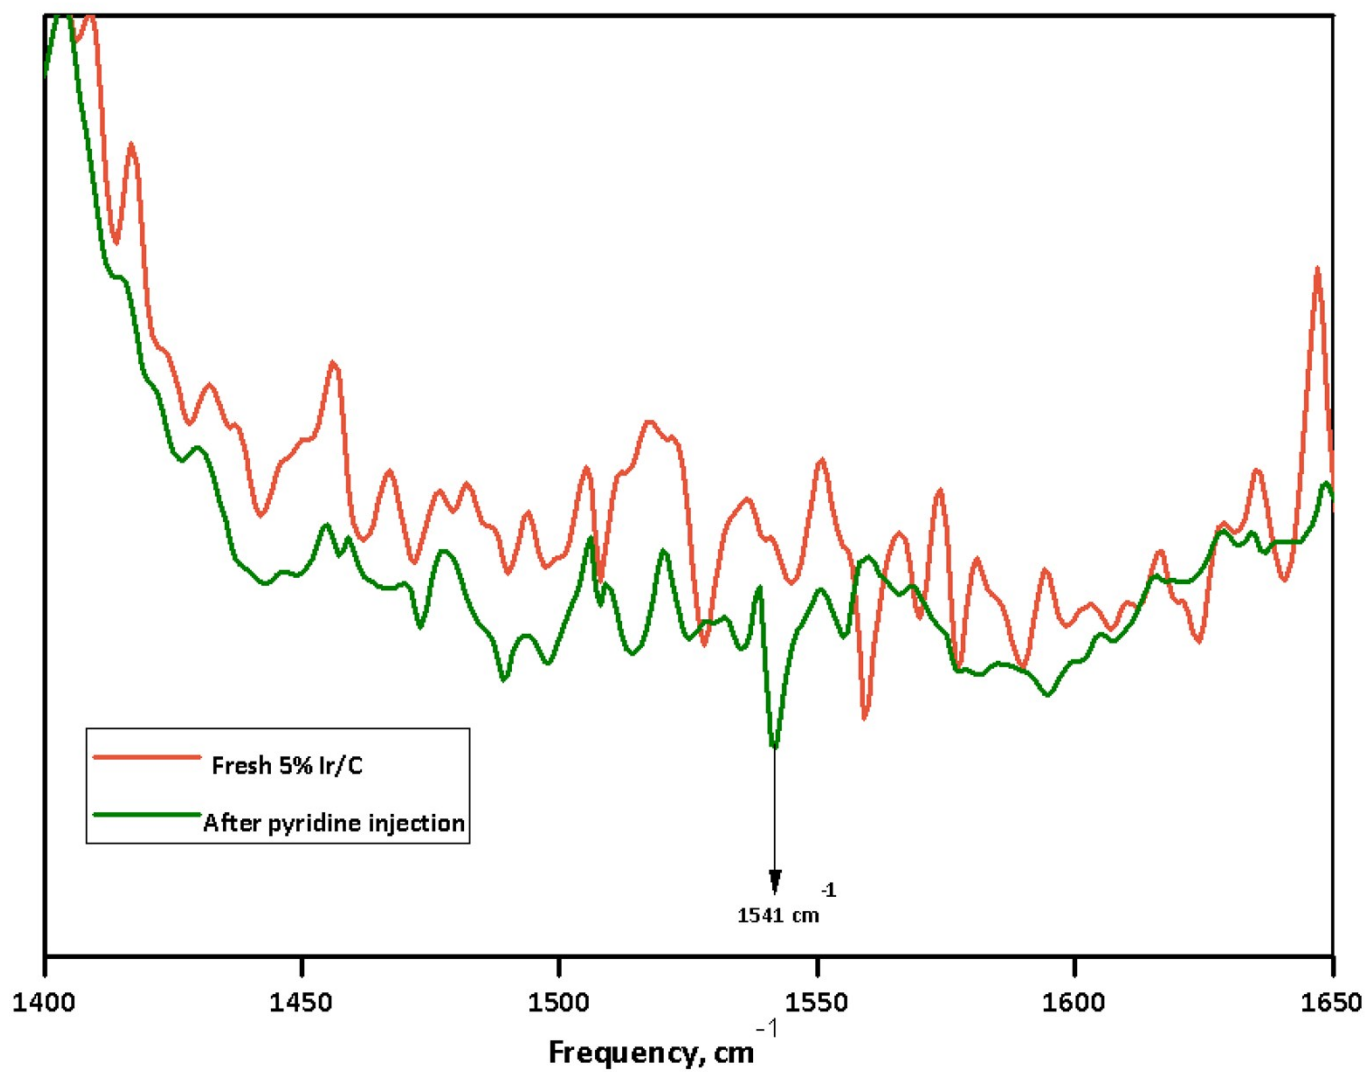

Figure S4: Effect of substrate loading

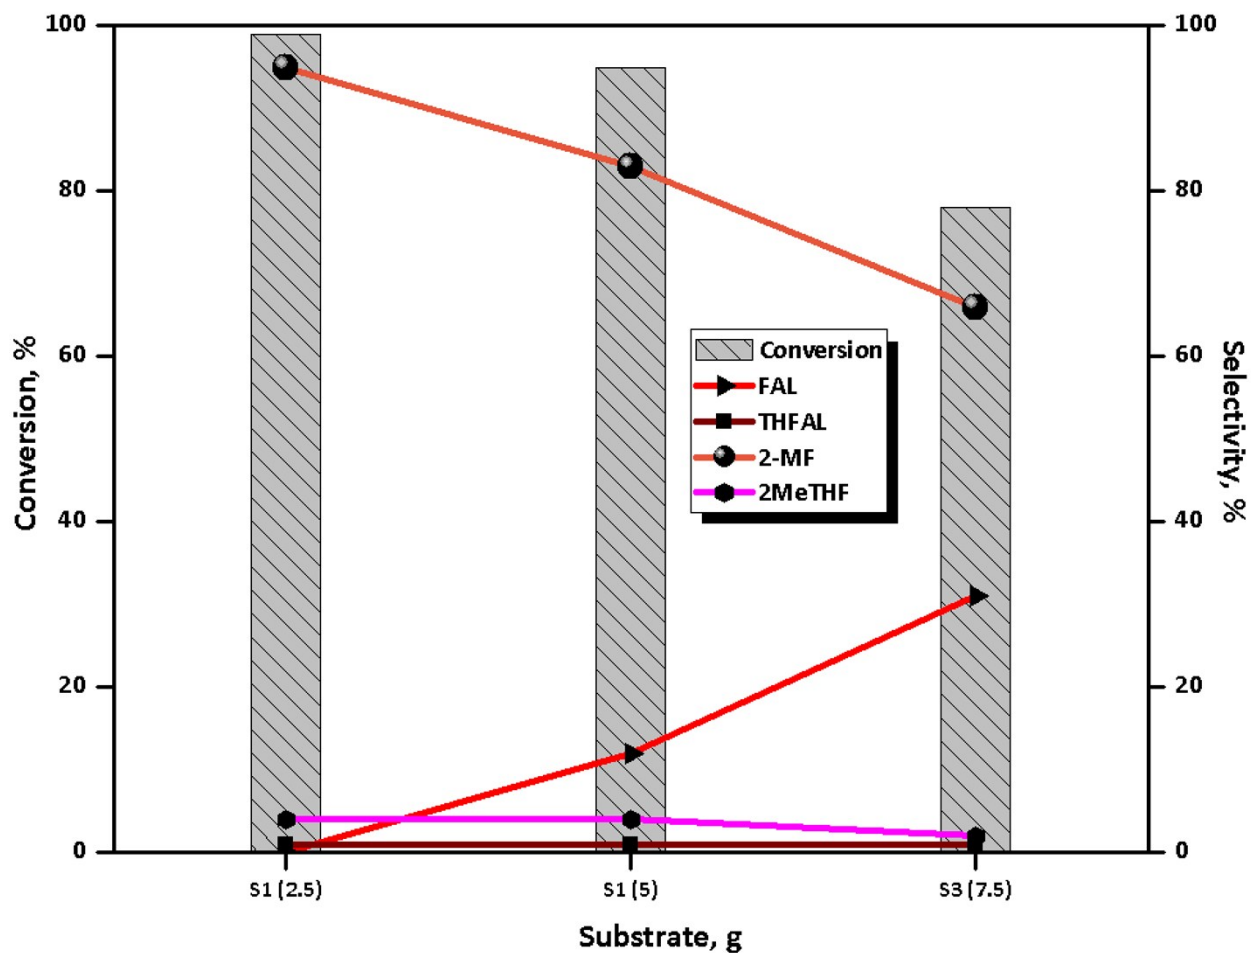

**Reaction conditions:** furfural, 2.5g; solvent (IPA), 95ml; catalyst, 0.25g, temp., 220 °C; pressure, 100 psig; Agitation speed, 1000 rpm, time, 5h.

Figure S5: Catalyst recycle at high pressure: 500 psig

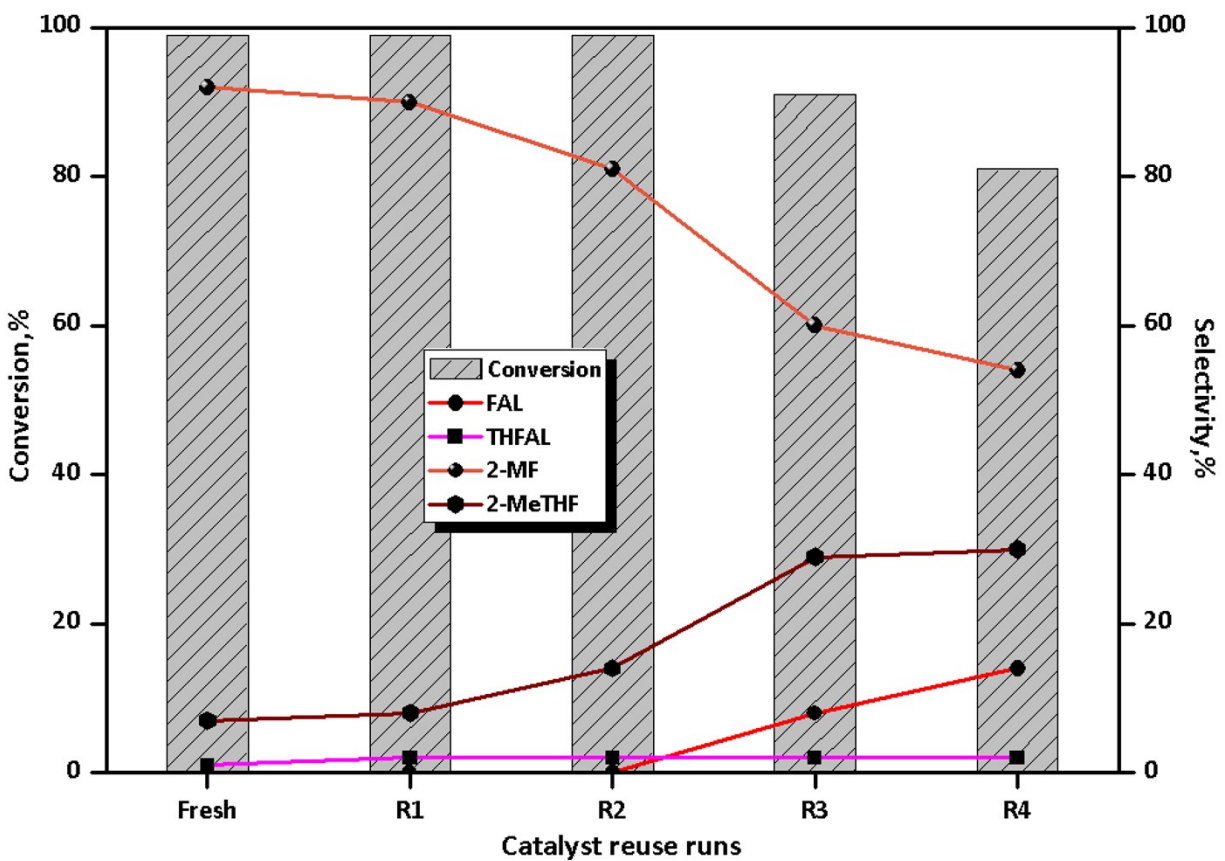

**Reaction conditions:** furfural, 2.5g; solvent (IPA), 95ml; catalyst, 0.25g, temp., 220 °C; pressure, 500 psig; Agitation speed, 1000 rpm, time, 5h.

Figure S6: XRD of used 5% Ir/C)

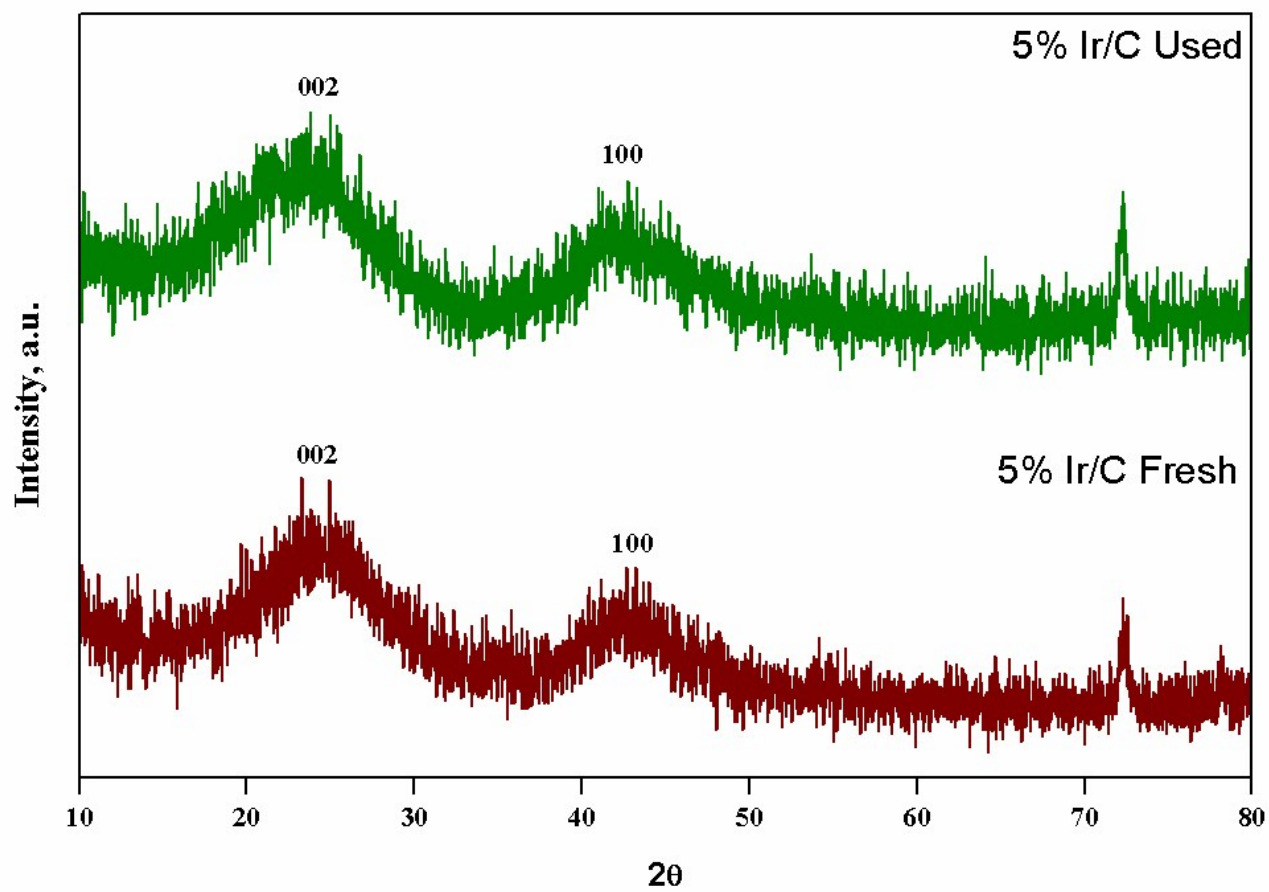

Figure S7: XPS of 5% Ir/C used catalyst: Oxygen

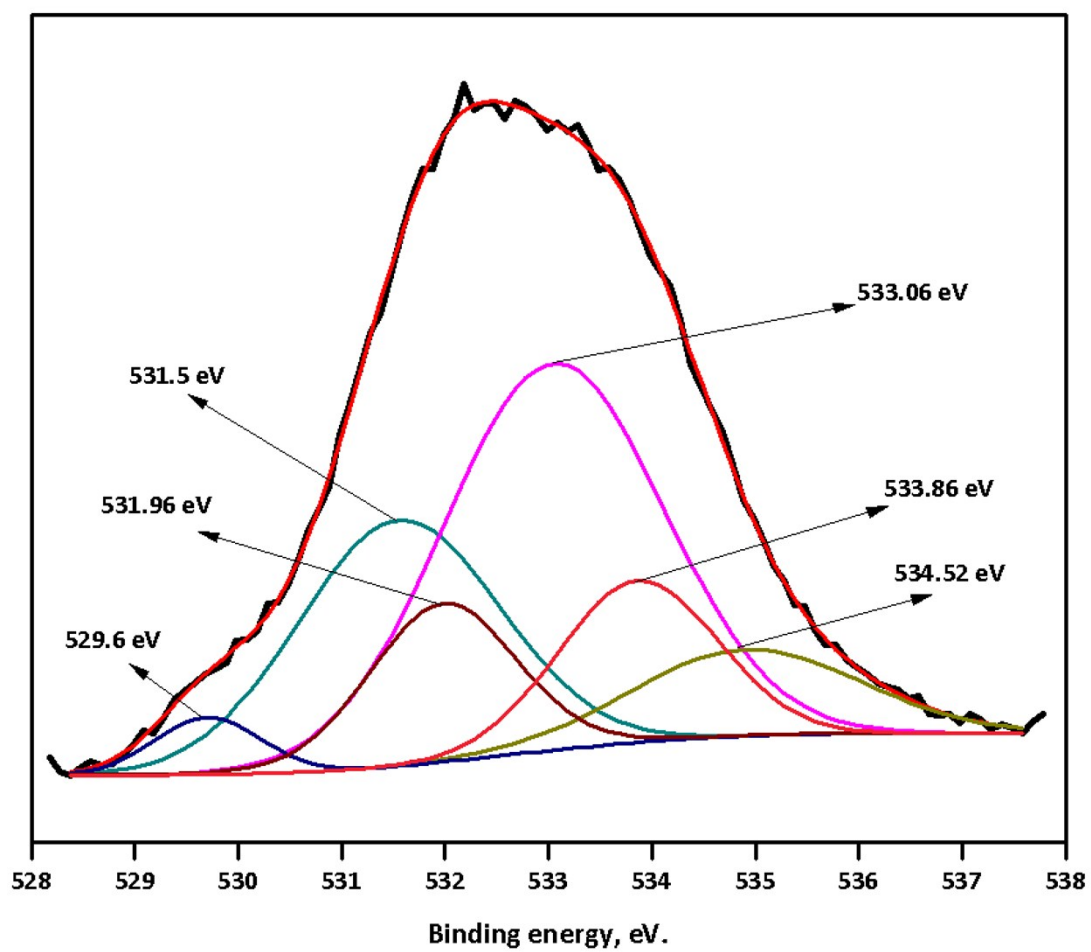

Figure S8: XPS of 5% Ir/C used catalyst Carbon

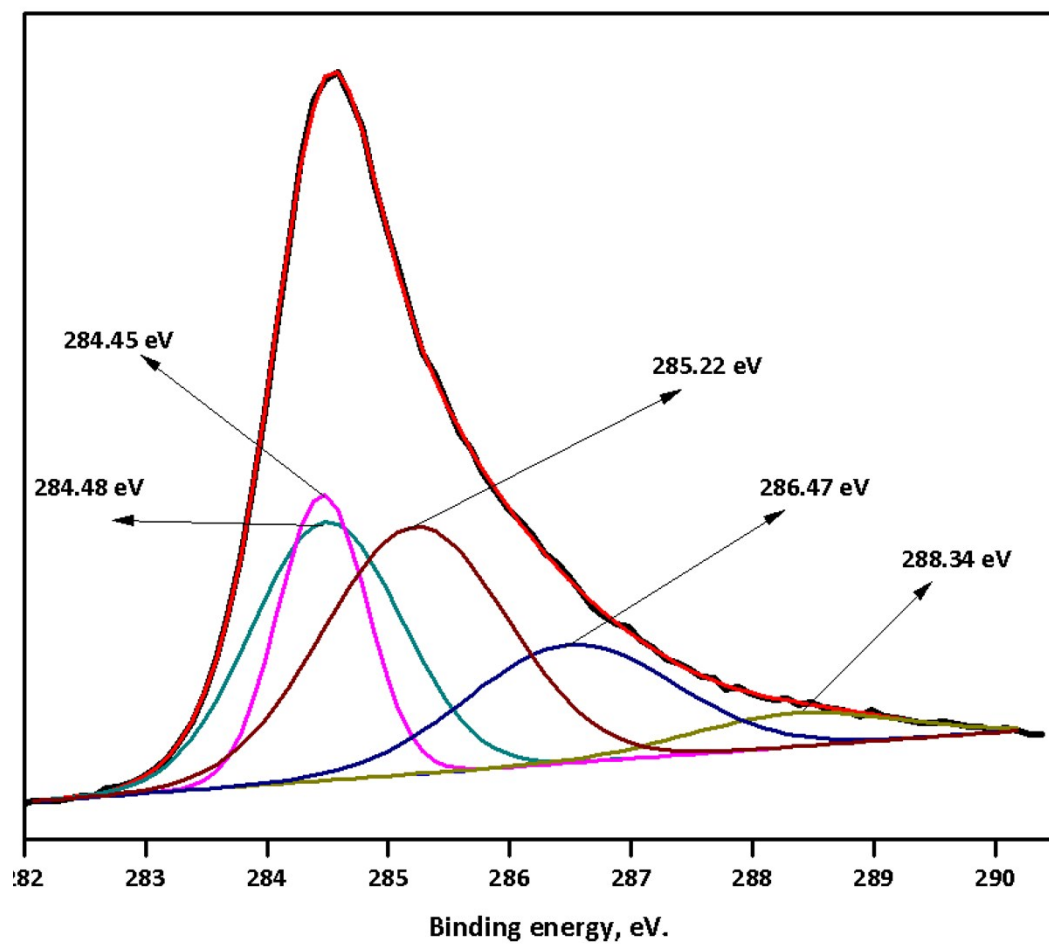

**S9: CT profile over IrO<sub>2</sub>/IrO<sub>3</sub>/C catalyst: 5% Ir/C unreduced**

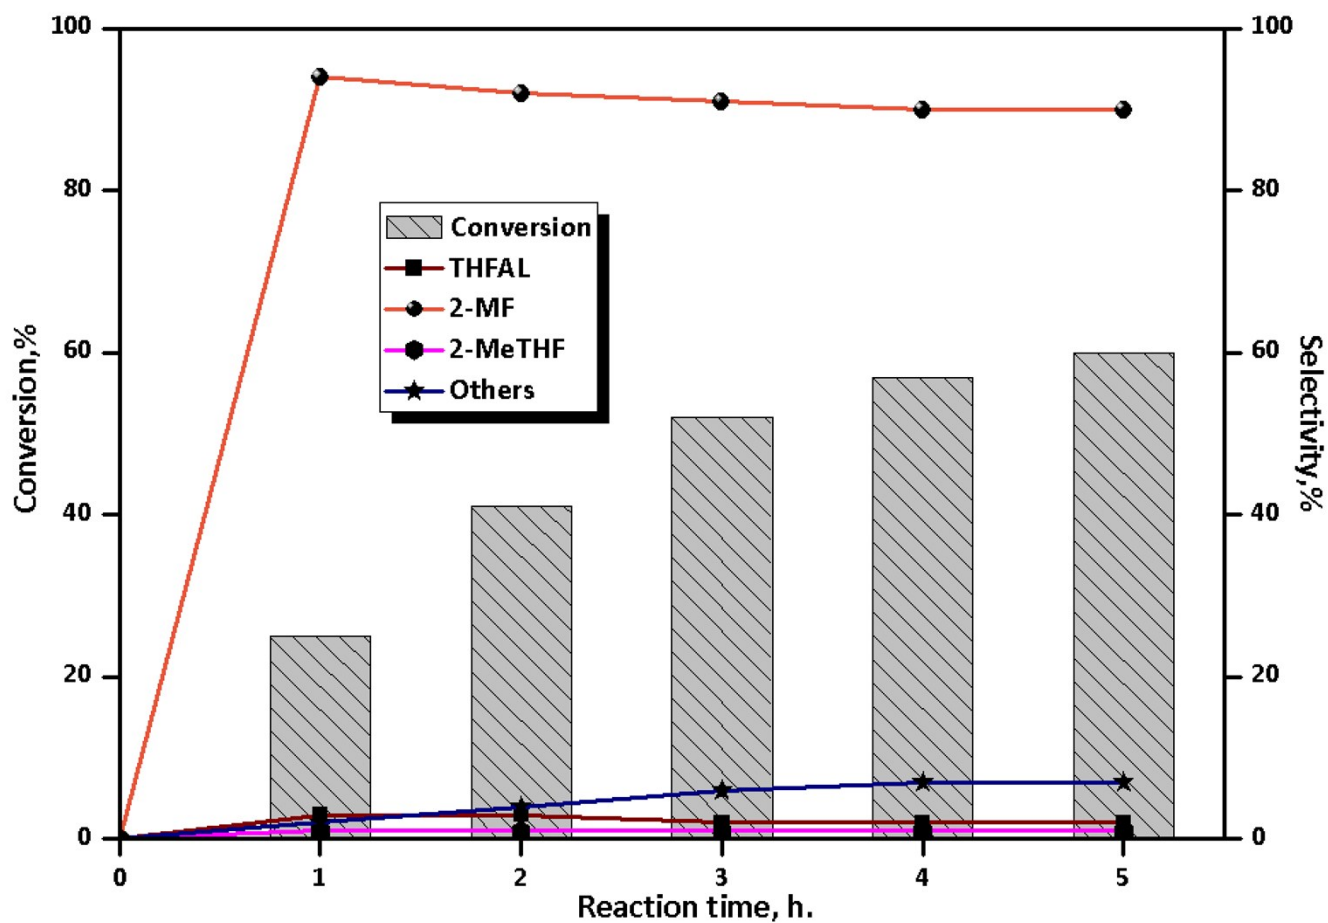

**Reaction conditions:** Furfuryl alcohol, 2.5g; solvent (IPA), 95ml; catalyst, 0.25g; temperature, 220 °C; H<sub>2</sub> pressure, 100 psig; Agitation speed, 1000 rpm, time, 5h.

Figure S10: XPS of 5% Ir/C unreduced.

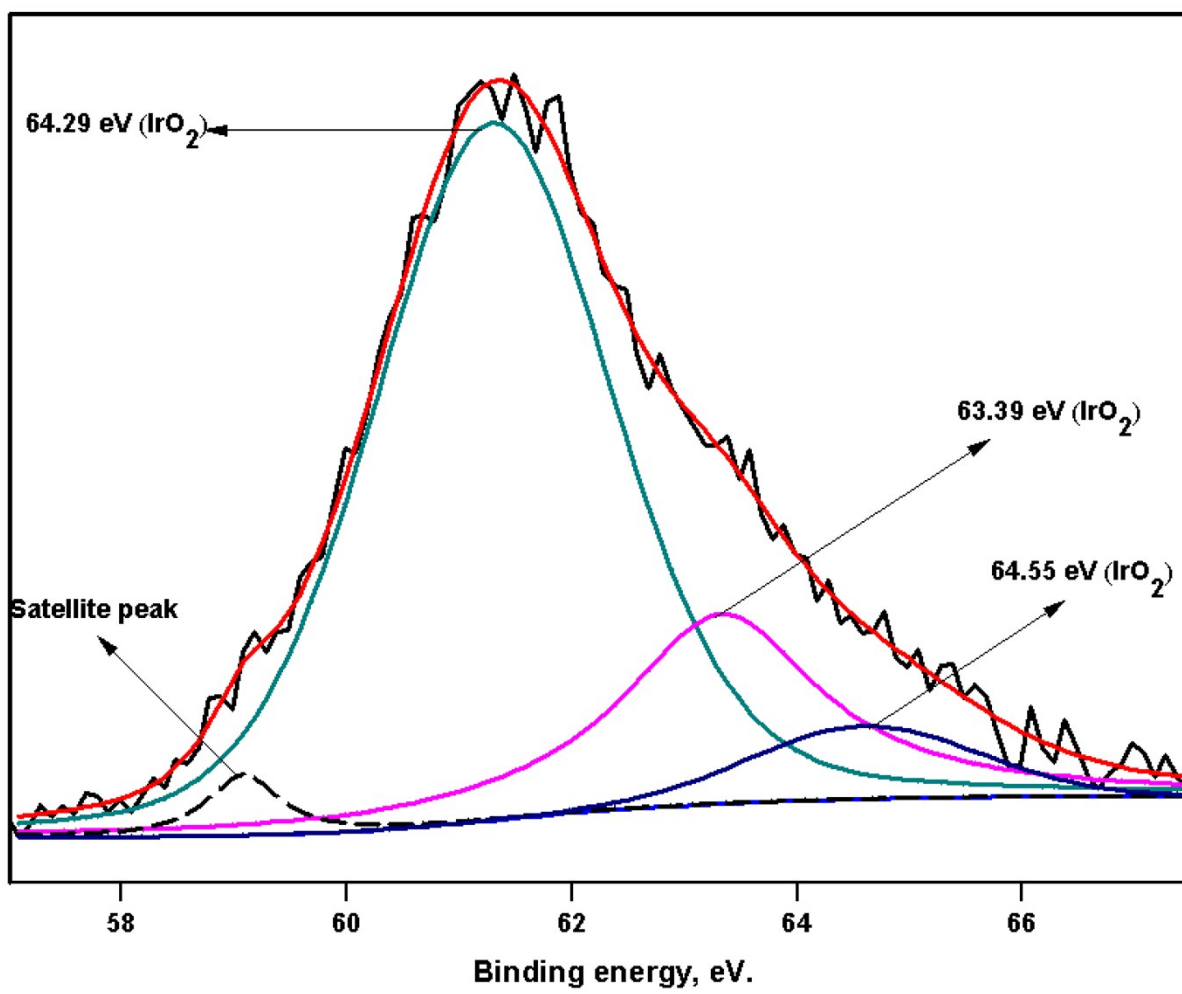



**Figure S11: Mass spectrum of 2-Methyl furan along with GC mass.**

Line#:1 R.Time:3.130(Scan#:227)

MassPeaks:181

RawMode:Averaged 3.125-3.135(226-228) BasePeak:82(2002653)

BG Mode:Calc. from Peak Group 1 - Event 1

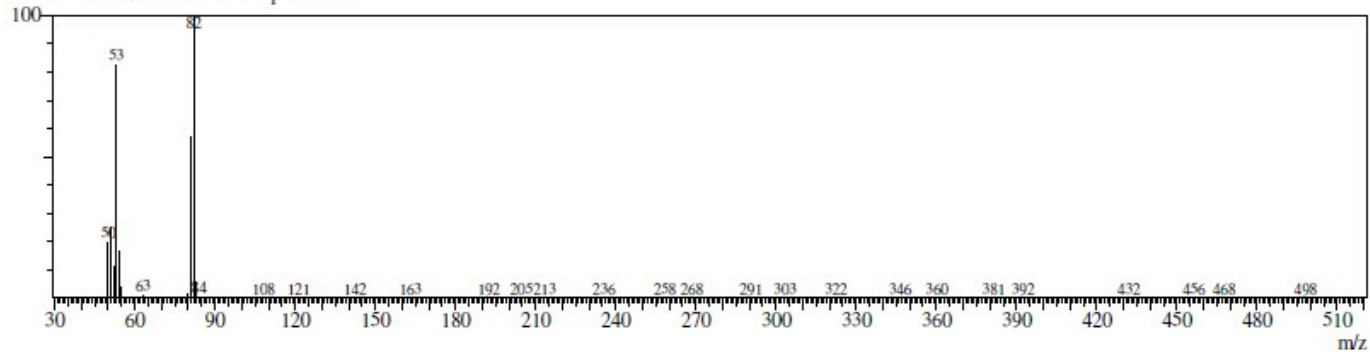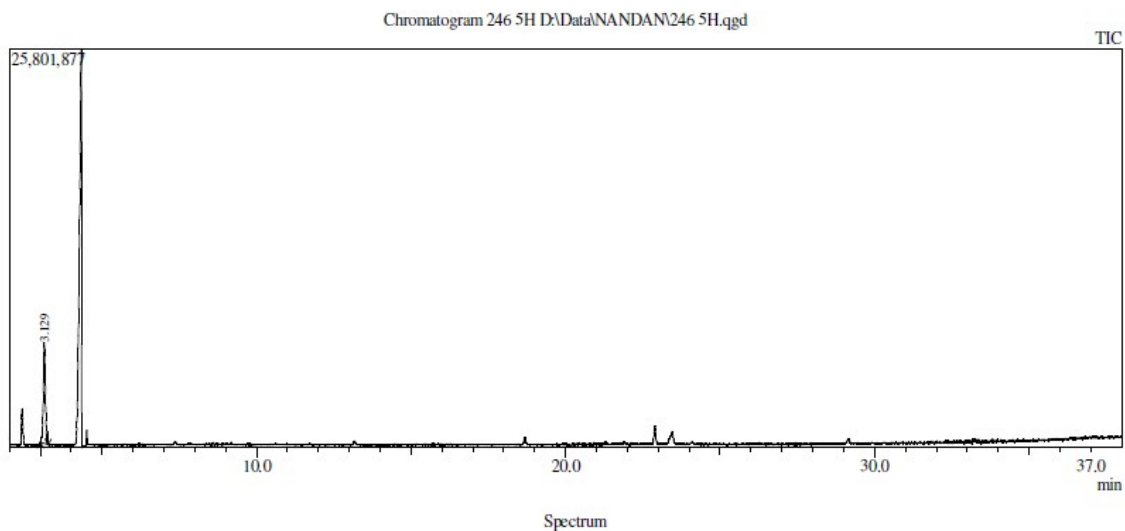

Peaks originates between 22 and 23, are mainly due to traces of FAL and FFR. Arises due to high sensitivity of mass spectrum.
